# Supplementary material for: Exploring the Assembly of Resorc[4]arenes for the Construction of Supramolecular Nano-Aggregates
Source: MDPI journal article supplement (doi:10.3390/ijms222111785), 2021-10-29
Supplement: s1 [file s1]

# Exploring the Assembly of Resorc[4]arenes for the Construction of Supramolecular Nano-aggregates

Fabio Buonsenso <sup>1</sup>, Francesca Ghirga <sup>1</sup>, Isabella Romeo <sup>1,2</sup>, Gabriella Siani <sup>3</sup>, Serena Pilato <sup>3</sup>, Deborah Quaglio <sup>1,\*</sup>, Marco Pierini <sup>1,\*</sup>, Bruno Botta <sup>1</sup> and Andrea Calcaterra <sup>1</sup>

<sup>1</sup> Department of Chemistry and Technology of Drugs, “Department of Excellence 2018–2022”, Sapienza University of Rome, P. le Aldo Moro 5, 00185, Rome, Italy

<sup>2</sup> Center for Life Nano and Neuroscience Italian Institute of Technology, Viale Regina Elena 291, 00161, Rome, Italy

<sup>3</sup> Department of Pharmacy, University of Chieti “G. D’Annunzio”, via dei Vestini 31, 66013, Chieti, Italy

Corresponding author e-mail: [deborah.quaglio@uniroma1.it](mailto:deborah.quaglio@uniroma1.it); [marco.pierini@uniroma1.it](mailto:marco.pierini@uniroma1.it)

## Table of contents

|                                                   |    |
|---------------------------------------------------|----|
| 1. pH variations                                  | 2  |
| 2. <sup>1</sup> H and <sup>13</sup> C NMR spectra | 3  |
| 2.1 Compound <b>3</b>                             | 3  |
| 2.2 Compound <b>R1</b>                            | 4  |
| 2.3 Compound <b>R2</b>                            | 5  |
| 3. ESI-HRMS of <b>R2</b>                          | 6  |
| 4. UV-visible experiments and DLS measurements    | 7  |
| 4.1 Table S1                                      | 7  |
| 4.1 Table S2                                      | 7  |
| 4.1 Table S3                                      | 7  |
| 4.1 Table S4                                      | 8  |
| 4.1 Table S5                                      | 8  |
| 4.1 Table S6                                      | 9  |
| 4.1 Table S7                                      | 9  |
| 4.1 Table S8                                      | 10 |
| 4.1 Table S9                                      | 10 |
| 4.1 Table S10                                     | 11 |
| 4.1 Table S11                                     | 12 |

## 1. pH variations

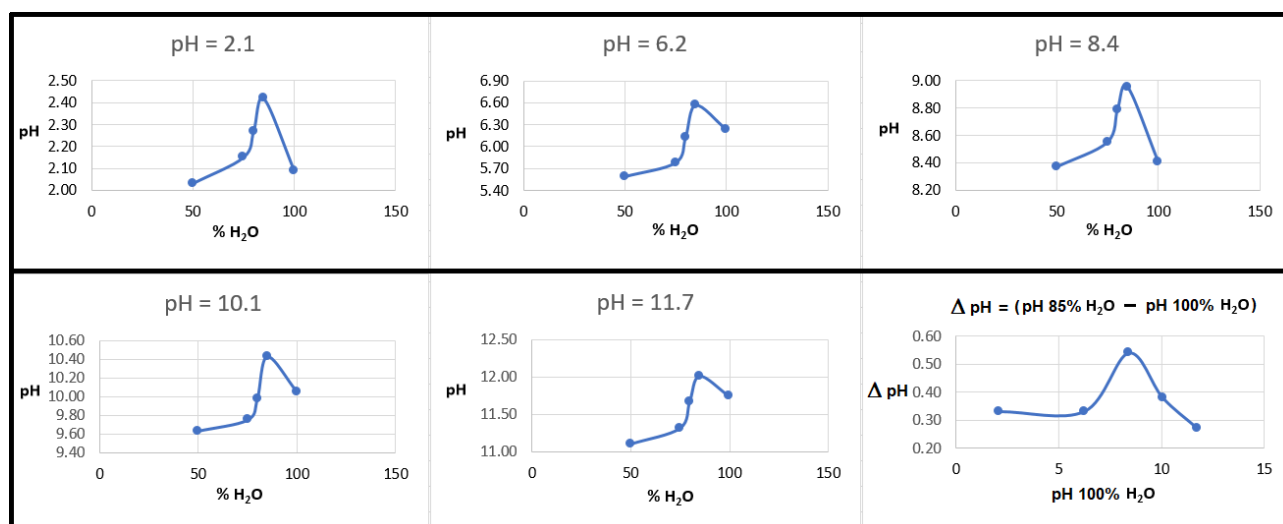

Fig. S1. pH variations of THF/water solutions depending on the mixture composition and different prefixed pH values.

## 2. $^1\text{H}$ and $^{13}\text{C}$ NMR spectra

### Compound 3

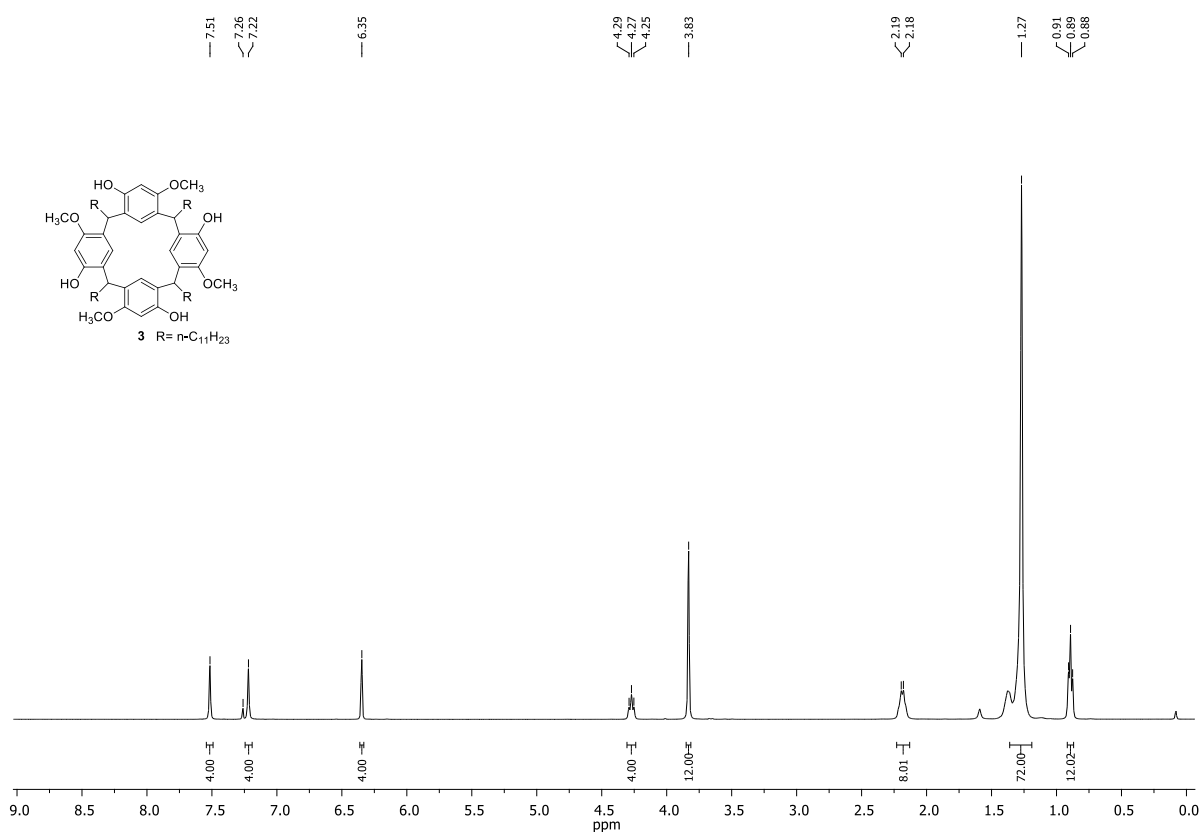

Fig. S2.  $^1\text{H}$  NMR spectrum of compound **3** (CDCl<sub>3</sub>, 400 MHz).

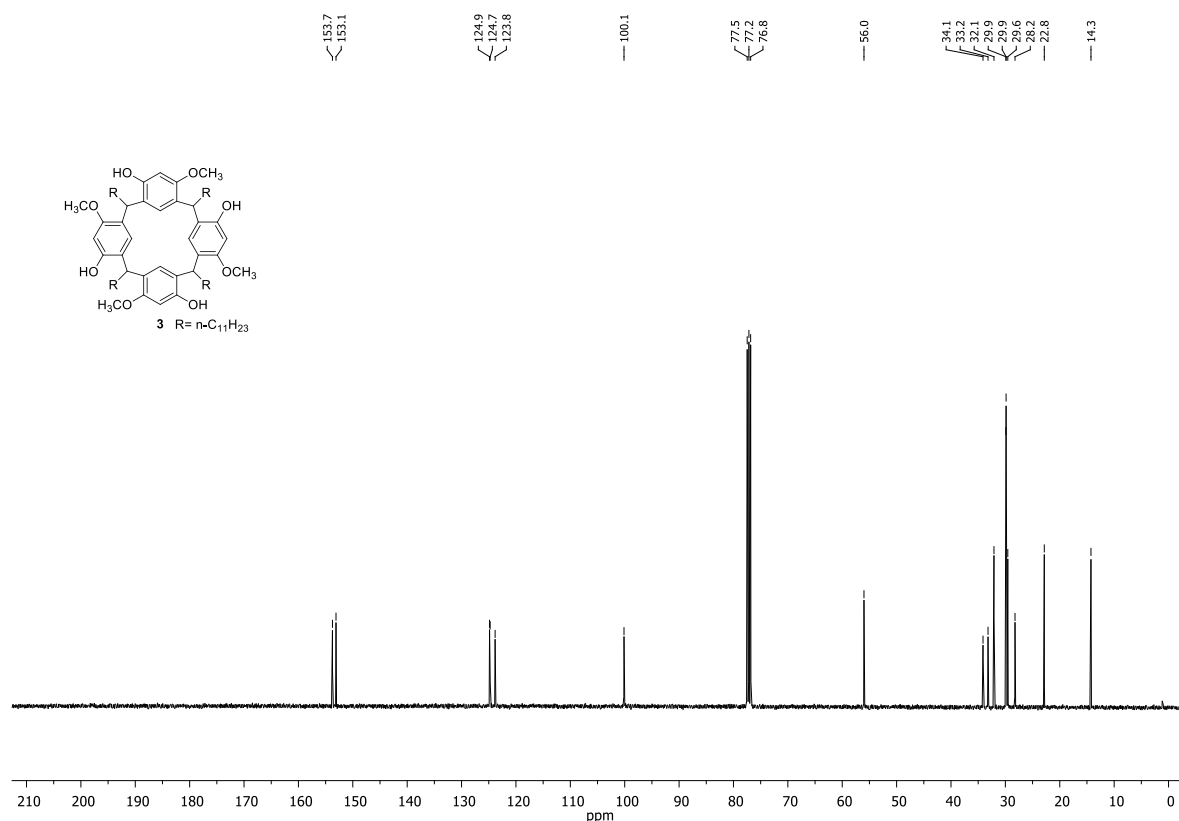

Fig. S3.  $^{13}\text{C}$  NMR spectrum of compound **3** (CDCl<sub>3</sub>, 101 MHz).

# Compound R1

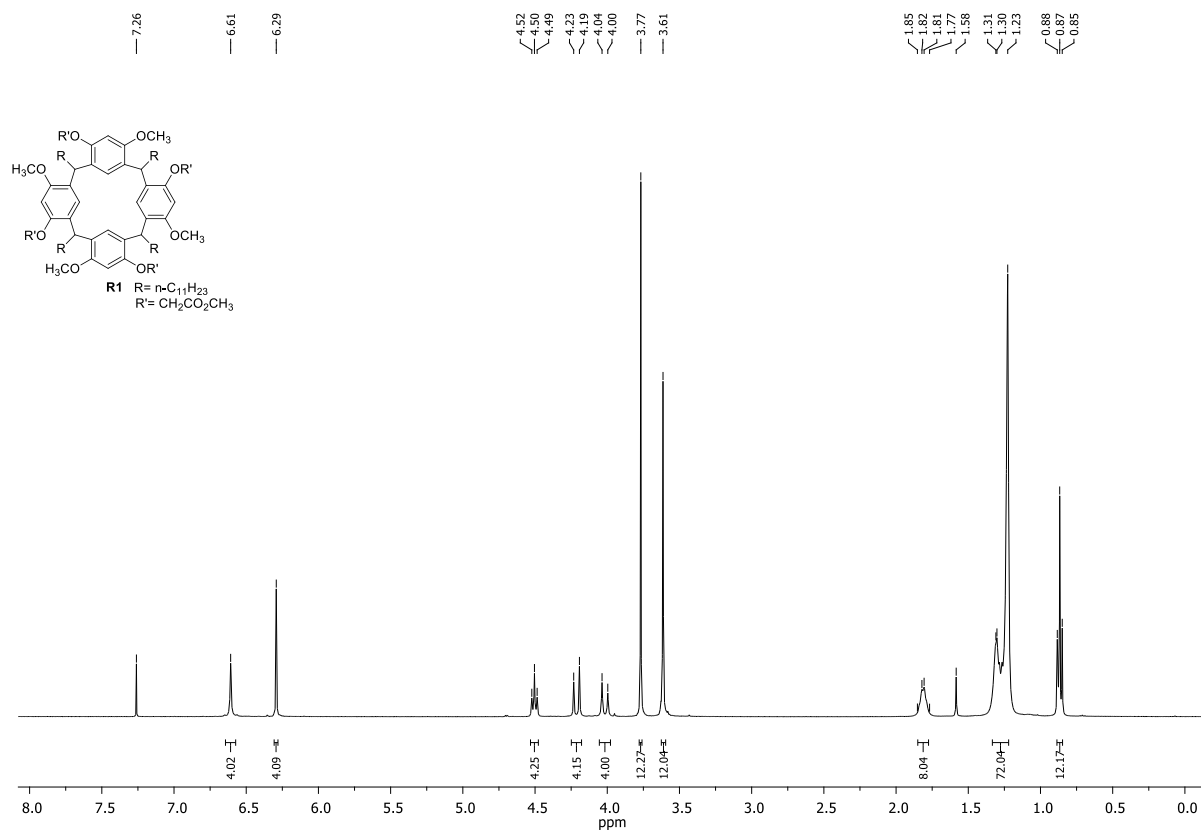

Fig. S4. <sup>1</sup>H NMR spectrum of compound **R1** (CDCl<sub>3</sub>, 400 MHz).

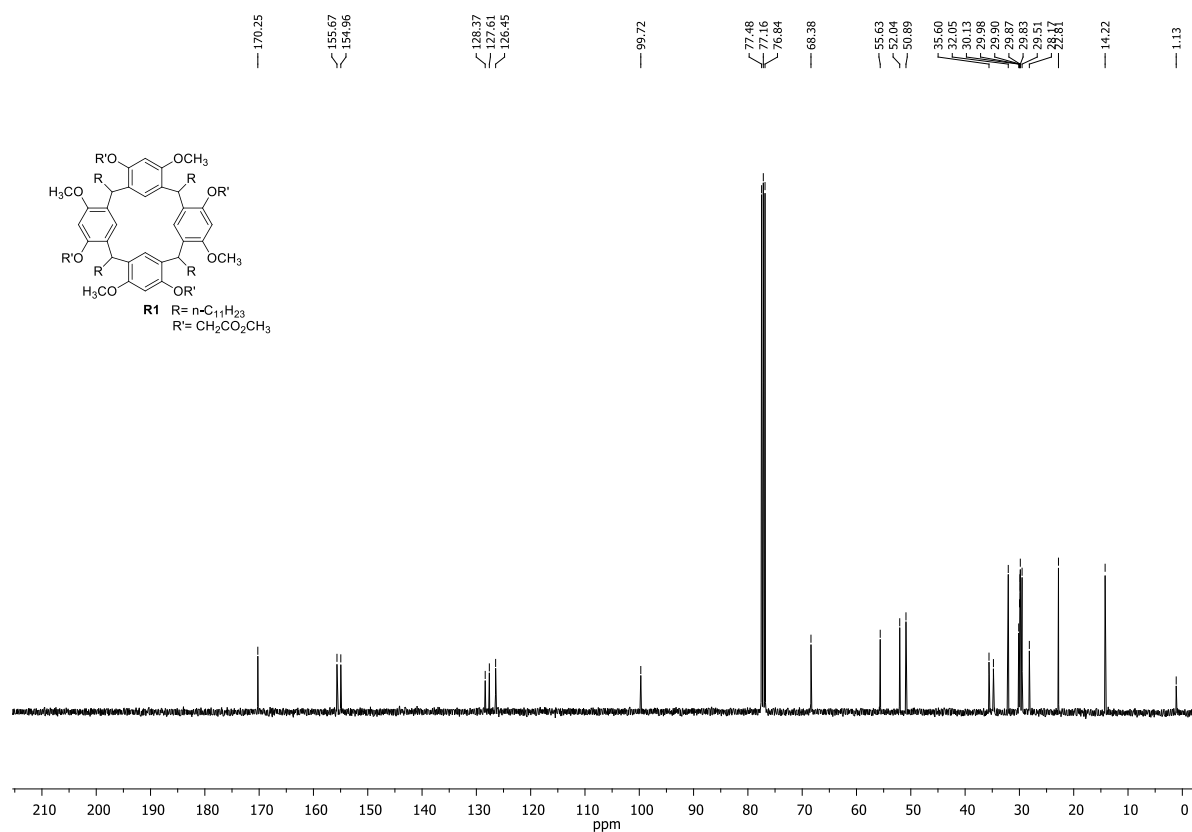

Fig. S5. <sup>13</sup>C NMR spectrum of compound **R1** (CDCl<sub>3</sub>, 101 MHz).

# Compound R2

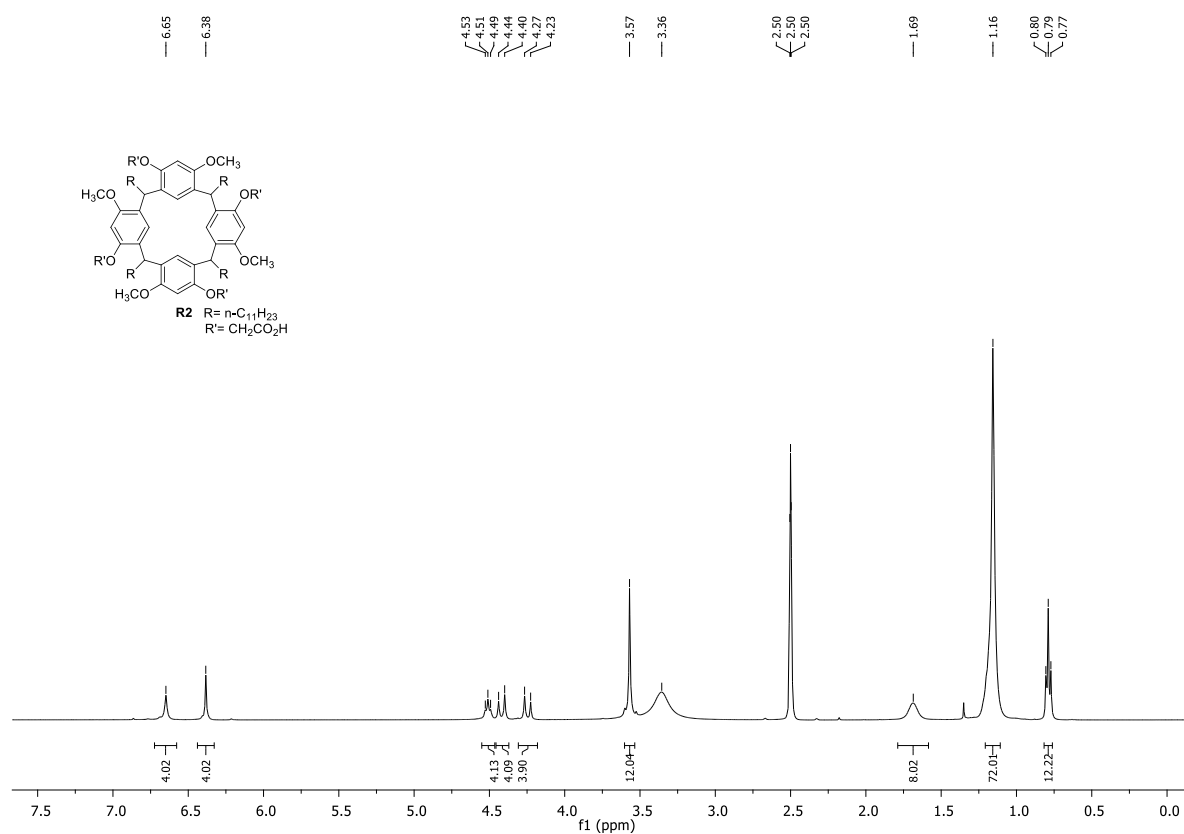

Fig. S6. <sup>1</sup>H NMR spectrum of compound **R2** (DMSO-*d*<sub>6</sub>, 400 MHz).

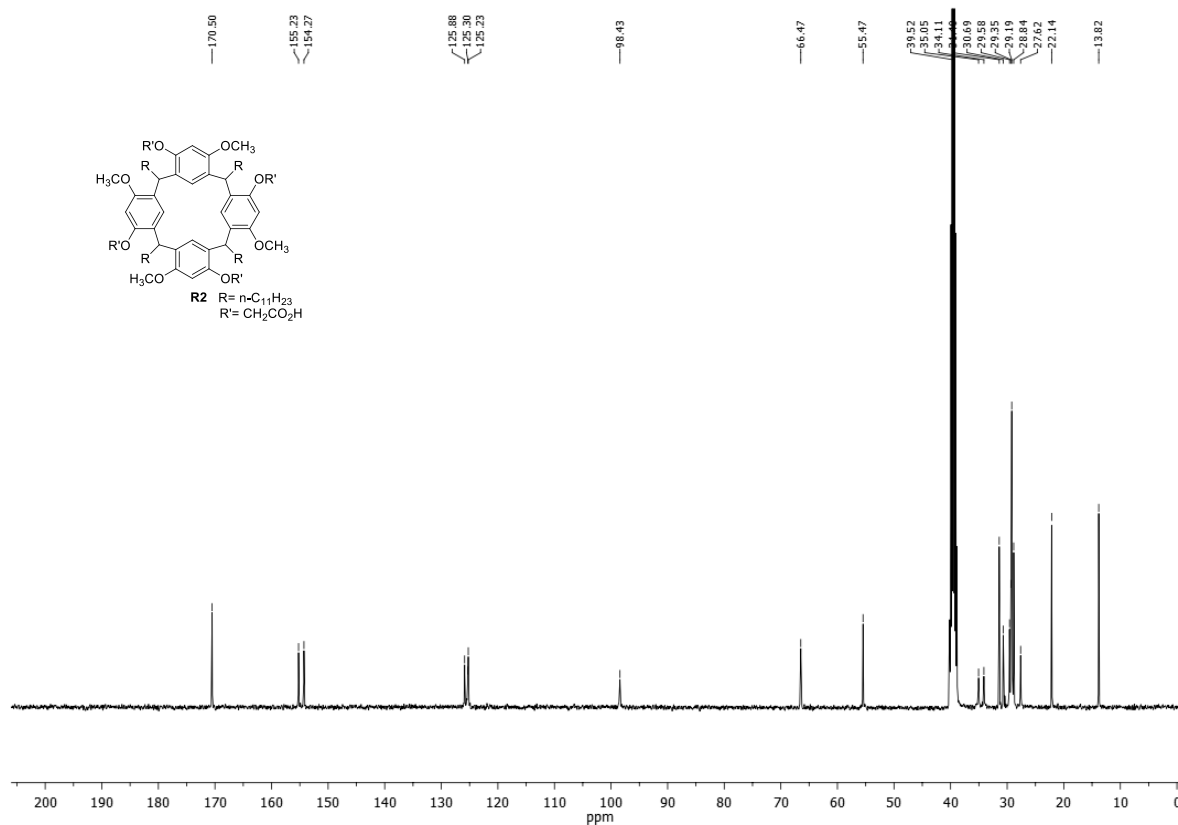

Fig. S7. <sup>13</sup>C NMR spectrum of compound **R2** (DMSO-*d*<sub>6</sub>, 101 MHz).

### 3. ESI-HRMS of R2

T: FTMS - p ESI Full ms [200.00-2000.00]

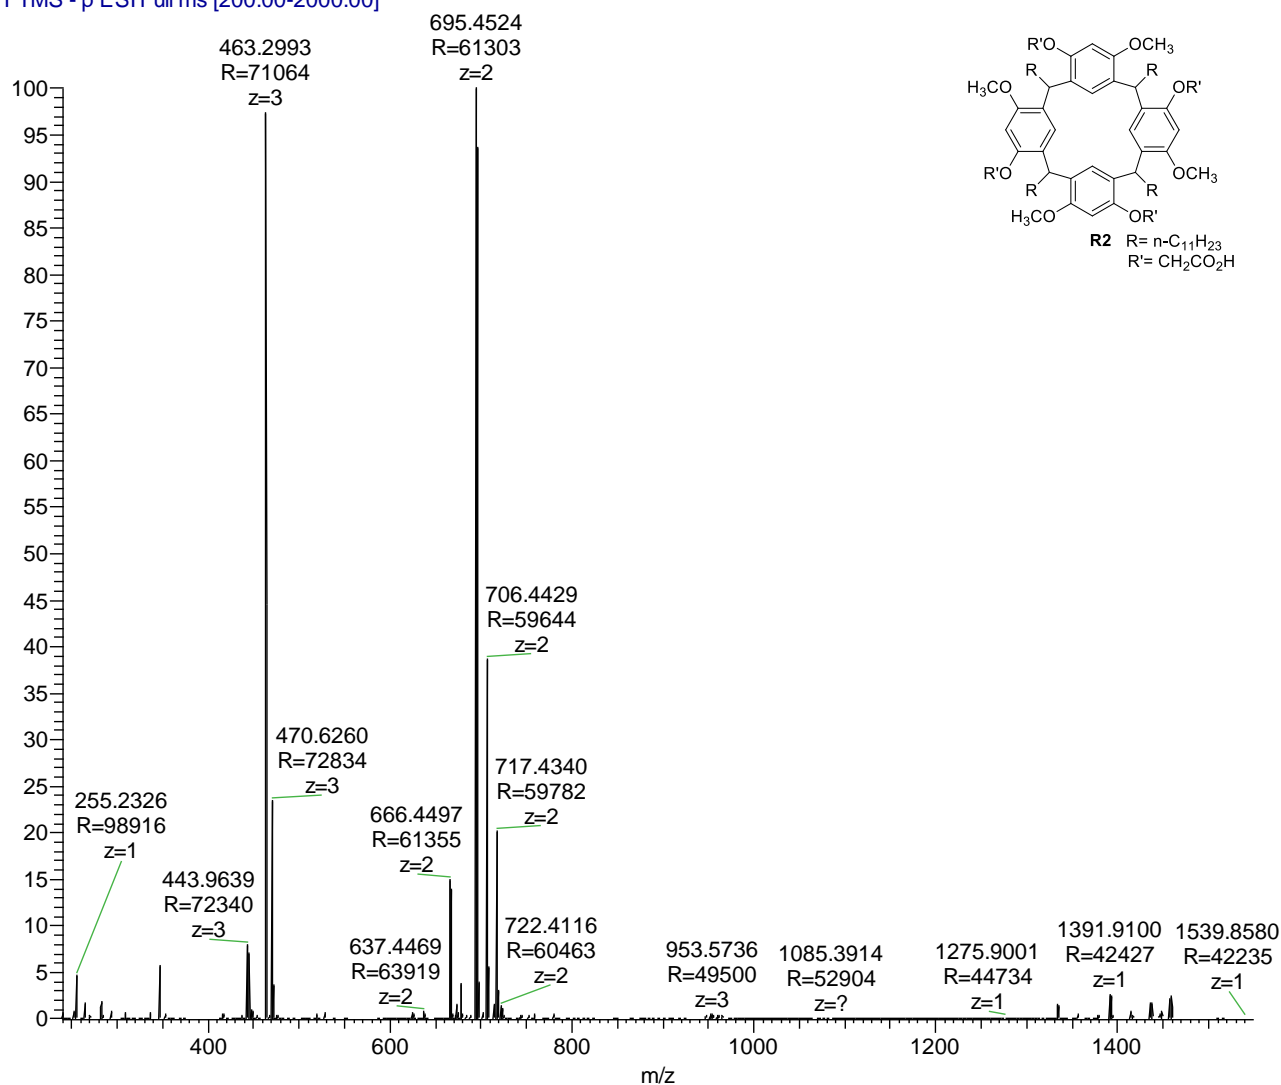

Fig. S8. ESI-HRMS spectrum of compound **R2**.

#### 4. UV-visible experiments and DLS measurements

| % H <sub>2</sub> O | $\delta_H$ | $\Delta\text{ABS}_{(350-400)}$ | $\varnothing$ t = 0 h | $\varnothing$ t = 1 h | var. % |
|--------------------|------------|--------------------------------|-----------------------|-----------------------|--------|
| 68                 | 18.82      | 0.01170                        | 461.9                 | 646.5                 | 40.0   |
| 75                 | 19.83      | 0.02750                        | 702.5                 | 1259.6                | 79.3   |
| 90                 | 21.97      | 0.00311                        | 259.6                 | 298.8                 | 15.1   |
| 95                 | 22.69      | 0.00121                        | 212.4                 | 201.7                 | -5.0   |

Table S1. **R3** pH 9.96 from 68% to 95% H<sub>2</sub>O.

| h  | $\varnothing$ (nm) | var. % |
|----|--------------------|--------|
| 0  | 276.4              | 0.0    |
| 1  | 275.1              | -0.4   |
| 2  | 240.6              | -12.9  |
| 4  | 135.7              | -50.9  |
| 5  | 141.2              | -48.9  |
| 21 | 315.8              | 14.3   |
| 24 | 363.6              | 31.6   |

Table S2. **R3 + GlA<sub>B</sub>** pH 11.8, 95% H<sub>2</sub>O.

|          | Sample in THF (mL) | H <sub>2</sub> O (mL) | THF (mL) | Final water percentage | $\delta_H$ | $\varnothing$ (nm) estimated values | $\Delta\text{ABS}_{(350-400)}$ |
|----------|--------------------|-----------------------|----------|------------------------|------------|-------------------------------------|--------------------------------|
| 1        | 0.3                | 0                     | 1.700    | 0                      | 9.1        | 222                                 | 0.00091                        |
| Baseline | 0                  | 0                     | 2.000    | -                      |            |                                     |                                |
| 2        | 0.3                | 0.697                 | 1.003    | 34.9                   | 14.09      | 259                                 | 0.00286                        |
| Baseline | 0                  | 0.697                 | 1.303    | -                      |            |                                     |                                |
| 3        | 0.3                | 1.020                 | 0.680    | 51.0                   | 16.39      | 273                                 | 0.00364                        |
| Baseline | 0                  | 1.020                 | 0.980    | -                      |            |                                     |                                |
| 4        | 0.3                | 1.105                 | 0.595    | 55.3                   | 17.01      | 731                                 | 0.02821                        |
| Baseline | 0                  | 1.105                 | 0.895    | -                      |            |                                     |                                |
| 5        | 0.3                | 1.156                 | 0.544    | 57.8                   | 17.37      | 2141                                | 0.10390                        |
| Baseline | 0                  | 1.156                 | 0.844    | -                      |            |                                     |                                |
| 6        | 0.3                | 1.190                 | 0.510    | 59.5                   | 17.61      | 2764                                | 0.13731                        |
| Baseline | 0                  | 1.190                 | 0.810    | -                      |            |                                     |                                |
| 7        | 0.3                | 1.360                 | 0.340    | 68.0                   | 18.82      | 2864                                | 0.1427                         |
| Baseline | 0                  | 1.360                 | 0.640    | -                      |            |                                     |                                |
| 8        | 0.3                | 1.700                 | 0        | 85.0                   | 21.26      | 3294                                | 0.16579                        |
| Baseline | 0                  | 1.700                 | 0.300    | -                      |            |                                     |                                |

Table S3. **R1**

|          | Sample in THF (mL) | H <sub>2</sub> O (mL) | THF (mL) | Final water percentage | $\delta_H$ | $\varnothing$ (nm) estimated values | $\Delta\text{ABS}_{(350-400)}$ |
|----------|--------------------|-----------------------|----------|------------------------|------------|-------------------------------------|--------------------------------|
| 1        | 0.3                | 0                     | 1.700    | 0                      | 9.10       |                                     | 0.001060                       |
| Baseline | 0                  | 0                     | 2.000    | -                      |            |                                     |                                |
| 2        | 0.3                | 0.697                 | 1.003    | 34.9                   | 14.09      |                                     | -0.000200                      |
| Baseline | 0                  | 0.697                 | 1.303    | -                      |            |                                     |                                |
| 3        | 0.3                | 1.020                 | 0.680    | 51.0                   | 16.39      |                                     | -0.000840                      |
| Baseline | 0                  | 1.020                 | 0.980    | -                      |            |                                     |                                |
| 4        | 0.3                | 1.105                 | 0.595    | 55.3                   | 17.01      |                                     | -0.000110                      |
| Baseline | 0                  | 1.105                 | 0.895    | -                      |            |                                     |                                |
| 5        | 0.3                | 1.190                 | 0.510    | 59.5                   | 17.61      |                                     | -0.000180                      |
| Baseline | 0                  | 1.190                 | 0.810    | -                      |            |                                     |                                |
| 6        | 0.3                | 1.360                 | 0.340    | 68.0                   | 18.82      | 253.2                               | 0.002570                       |
| Baseline | 0                  | 1.360                 | 0.640    | -                      |            |                                     |                                |
| 7        | 0.3                | 1.500                 | 0.200    | 75.0                   | 19.83      | 839.0                               | 0.034010                       |
| Baseline |                    | 1.500                 | 0.500    | -                      |            |                                     |                                |
| 8        | 0.3                | 1.700                 | 0        | 85.0                   | 21.26      | 986.0                               | 0.041900                       |
| Baseline | 0                  | 1.700                 | 0.300    | -                      |            |                                     |                                |

Table S4. R2 pH 6.21

|          | Sample in THF (mL) | H <sub>2</sub> O/ buffer phosphate (mL) | THF (mL) | Final water percentage | $\delta_H$ | $\varnothing$ (nm) estimated values | $\Delta\text{ABS}_{(350-400)}$ |
|----------|--------------------|-----------------------------------------|----------|------------------------|------------|-------------------------------------|--------------------------------|
| 1        | 0.3                | 0                                       | 1.700    | 0                      | 9.10       |                                     | 0.00138                        |
| Baseline | 0                  | 0                                       | 2.000    | -                      |            |                                     |                                |
| 2        | 0.3                | 0.697                                   | 1.003    | 34.9                   | 14.09      |                                     | 0.00091                        |
| Baseline | 0                  | 0.697                                   | 1.303    | -                      |            |                                     |                                |
| 3        | 0.3                | 1.020                                   | 0.680    | 51.0                   | 16.39      | 233.2                               | 0.00150                        |
| Baseline | 0                  | 1.020                                   | 0.980    | -                      |            |                                     |                                |
| 4        | 0.3                | 1.105                                   | 0.595    | 55.3                   | 17.01      | 289.3                               | 0.00451                        |
| Baseline | 0                  | 1.105                                   | 0.895    | -                      |            |                                     |                                |
| 5        | 0.3                | 1.156                                   | 0.544    | 57.8                   | 17.37      | 393.1                               | 0.01008                        |
| Baseline | 0                  | 1.156                                   | 0.844    | -                      |            |                                     |                                |
| 6        | 0.3                | 1.190                                   | 0.510    | 59.5                   | 17.61      | 1294.2                              | 0.05844                        |
| Baseline | 0                  | 1.190                                   | 0.810    | -                      |            |                                     |                                |
| 7        | 0.3                | 1.360                                   | 0.340    | 68.0                   | 18.82      | 3514.1                              | 0.17758                        |
| Baseline | 0                  | 1.360                                   | 0.640    | -                      |            |                                     |                                |
| 8        | 0.3                | 1.500                                   | 0.200    | 75.0                   | 19.83      | 4479.7                              | 0.22940                        |
| Baseline | 0                  | 1.500                                   | 0.500    | -                      |            |                                     |                                |
| 9        | 0.3                | 1.700                                   | 0        | 85.0                   | 21.26      | 6714.9                              | 0.34936                        |
| Baseline | 0                  | 1.700                                   | 0.300    | -                      |            |                                     |                                |

Table S5. R2 pH 1.91



|          | Sample in THF (mL) | H <sub>2</sub> O/ buffer phosphate (mL) | THF (mL) | Final water percentage | $\delta_H$ | $\varnothing$ (nm) estimated values | $\Delta\text{ABS}_{(350-400)}$ |
|----------|--------------------|-----------------------------------------|----------|------------------------|------------|-------------------------------------|--------------------------------|
| 1        | 0.2                | 0                                       | 1.800    | 0                      | 9.10       |                                     | 0.00127                        |
| Baseline | 0                  | 0                                       | 2.000    | -                      |            |                                     |                                |
| 2        | 0.2                | 0.897                                   | 0.903    | 44.85                  | 15.51      |                                     | -0.00187                       |
| Baseline | 0                  | 0.897                                   | 1.103    | -                      |            |                                     |                                |
| 3        | 0.2                | 1.600                                   | 0.200    | 80                     | 20.54      | 249.1                               | 0.00235                        |
| Baseline | 0                  | 1.600                                   | 0.400    | -                      |            |                                     |                                |
| 4        | 0.2                | 1.700                                   | 0.100    | 85                     | 21.26      | 259.1                               | 0.00289                        |
| Baseline | 0                  | 1.700                                   | 0.300    | -                      |            |                                     |                                |
| 5        | 0.1                | 1.900                                   | 0        | 95                     | 22.69      | 370.0                               | 0.00884                        |
| Baseline | 0                  | 1.900                                   | 0.100    | -                      |            |                                     |                                |

Table S6. **R2** pH 8.70

|          | Sample in THF (mL) | H <sub>2</sub> O (mL) | THF (mL) | Final water percentage | $\delta_H$ | $\varnothing$ (nm) estimated values | $\Delta\text{ABS}_{(350-400)}$ |
|----------|--------------------|-----------------------|----------|------------------------|------------|-------------------------------------|--------------------------------|
| 1        | 0.3                | 0                     | 1.700    | 0                      | 9.10       |                                     | 0.00079                        |
| Baseline | 0                  | 0                     | 2.000    | -                      |            |                                     |                                |
| 2        | 0.3                | 0.697                 | 1.003    | 34.9                   | 14.09      |                                     | 0.00032                        |
| Baseline | 0                  | 0.697                 | 1.303    | -                      |            |                                     |                                |
| 3        | 0.3                | 1.020                 | 0.680    | 51.0                   | 16.39      |                                     | -0.000189                      |
| Baseline | 0                  | 1.020                 | 0.980    | -                      |            |                                     |                                |
| 4        | 0.3                | 1.105                 | 0.595    | 55.3                   | 17.01      | 226.0                               | 0.00111                        |
| Baseline | 0                  | 1.105                 | 0.895    | -                      |            |                                     |                                |
| 5        | 0.3                | 1.190                 | 0.510    | 59.5                   | 17.61      | 650.4                               | 0.02389                        |
| Baseline | 0                  | 1.190                 | 0.810    | -                      |            |                                     |                                |
| 6        | 0.3                | 1.270                 | 0.430    | 63.5                   | 18.18      | 1229.0                              | 0.05494                        |
| Baseline | 0                  | 1.270                 | 0.730    | -                      |            |                                     |                                |
| 7        | 0.3                | 1.600                 | 0.100    | 80.0                   | 20.54      | 1087.5                              | 0.04735                        |
| Baseline | 0                  | 1.600                 | 0.400    | -                      |            |                                     |                                |
| 8        | 0.3                | 1.700                 | 0        | 85.0                   | 21.26      | 1025.9                              | 0.04404                        |
| Baseline | 0                  | 1.700                 | 0.300    | -                      |            |                                     |                                |
| 9        | 0.2                | 1.800                 | 0        | 90.0                   | 21.97      | 636.8                               | 0.02316                        |
| Baseline | 0                  | 1.800                 | 0.200    | -                      |            |                                     |                                |

Table S7. **R3** pH 6.21

|          | Sample in THF (mL) | H <sub>2</sub> O/ buffer phosphate (mL) | THF (mL) | Final water percentage | $\delta_H$ | $\varnothing$ (nm) estimated values | $\Delta ABS_{(350-400)}$ |
|----------|--------------------|-----------------------------------------|----------|------------------------|------------|-------------------------------------|--------------------------|
| 1        | 0.3                | 0                                       | 1.700    | 0                      | 9.10       |                                     | 0.00079                  |
| Baseline | 0                  | 0                                       | 2.000    | -                      |            |                                     |                          |
| 2        | 0.3                | 1.020                                   | 0.680    | 51.0                   | 16.39      | 223.2                               | 0.00096                  |
| Baseline | 0                  | 1.020                                   | 0.980    | -                      |            |                                     |                          |
| 3        | 0.3                | 1.190                                   | 0.510    | 59.5                   | 17.61      | 1279.5                              | 0.05765                  |
| Baseline | 0                  | 1.190                                   | 0.810    | -                      |            |                                     |                          |
| 4        | 0.3                | 1.270                                   | 0.430    | 63.5                   | 18.18      | 2890.7                              | 0.14412                  |
| Baseline | 0                  | 1.270                                   | 0.730    | -                      |            |                                     |                          |
| 5        | 0.3                | 1.360                                   | 0.340    | 68.0                   | 18.82      | 4010.9                              | 0.20424                  |
| Baseline | 0                  | 1.360                                   | 0.640    | -                      |            |                                     |                          |
| 6        | 0.3                | 1.500                                   | 0.200    | 75.0                   | 19.83      | 4776.3                              | 0.24532                  |
| Baseline | 0                  | 1.500                                   | 0.500    | -                      |            |                                     |                          |
| 7        | 0.3                | 1.700                                   | 0        | 85.0                   | 21.26      | 5460.0                              | 0.28201                  |
| Baseline | 0                  | 1.700                                   | 0.300    | -                      |            |                                     |                          |

Table S8. **R3** pH 2.41

|          | Sample in THF (mL) | H <sub>2</sub> O/ buffer phosphate (mL) | THF (mL) | Final water percentage | $\delta_H$ | $\varnothing$ (nm) estimated values | $\Delta ABS_{(350-400)}$ |
|----------|--------------------|-----------------------------------------|----------|------------------------|------------|-------------------------------------|--------------------------|
| 1        | 0.3                | 0                                       | 1.700    | 0                      | 9.1        |                                     | 0.00079                  |
| Baseline | 0                  | 0                                       | 2.000    | -                      |            |                                     |                          |
| 2        | 0.3                | 1.020                                   | 0.680    | 51.0                   | 16.39      | 252.4                               | 0.00253                  |
| Baseline | 0                  | 1.020                                   | 0.980    | -                      |            |                                     |                          |
| 3        | 0.3                | 1.190                                   | 0.510    | 59.5                   | 17.61      | 980.6                               | 0.04161                  |
| Baseline | 0                  | 1.190                                   | 0.810    | -                      |            |                                     |                          |
| 4        | 0.3                | 1.270                                   | 0.430    | 63.5                   | 18.18      | 1610.4                              | 0.07541                  |
| Baseline | 0                  | 1.270                                   | 0.730    | -                      |            |                                     |                          |
| 5        | 0.3                | 1.360                                   | 0.340    | 68.0                   | 18.82      | 1093.3                              | 0.04766                  |
| Baseline | 0                  | 1.360                                   | 0.640    | -                      |            |                                     |                          |
| 6        | 0.3                | 1.500                                   | 0.200    | 75.0                   | 19.83      | 582.4                               | 0.02024                  |
| Baseline | 0                  | 1.500                                   | 0.500    | -                      |            |                                     |                          |
| 7        | 0.3                | 1.700                                   | 0        | 85.0                   | 21.26      | 310.4                               | 0.00564                  |
| Baseline | 0                  | 1.700                                   | 0.300    | -                      |            |                                     |                          |

Table S9. **R3** pH 8.52

|          | Sample in THF<br>(mL) | H <sub>2</sub> O/ buffer<br>phosphate (mL) | THF (mL) | Final water<br>percentage | $\delta_H$ | $\varnothing$ (nm)<br>estimated values | $\Delta\text{ABS}_{(350-400)}$ |
|----------|-----------------------|--------------------------------------------|----------|---------------------------|------------|----------------------------------------|--------------------------------|
| 1        | 0.3                   | 0                                          | 1.700    | 0                         | 9.1        |                                        | 0.00079                        |
| Baseline | 0                     | 0                                          | 2.000    | -                         |            |                                        |                                |
| 2        | 0.3                   | 0.800                                      | 0.900    | 40                        | 14.82      | 290.6                                  | 0.00458                        |
| Baseline | 0                     | 0.800                                      | 1.200    | -                         |            |                                        |                                |
| 3        | 0.3                   | 0.900                                      | 0.800    | 45                        | 15.54      | 344.1                                  | 0.00745                        |
| Baseline | 0                     | 0.900                                      | 1.100    | -                         |            |                                        |                                |
| 4        | 0.3                   | 1.020                                      | 0.680    | 51.0                      | 16.39      | 288.7                                  | 0.00448                        |
| Baseline | 0                     | 1.020                                      | 0.980    | -                         |            |                                        |                                |
| 5        | 0.3                   | 1.190                                      | 0.510    | 59.5                      | 17.61      | 232.7                                  | 0.00147                        |
| Baseline | 0                     | 1.190                                      | 0.810    | -                         |            |                                        |                                |
| 6        | 0.3                   | 1.270                                      | 0.430    | 63.5                      | 18.18      | 268.4                                  | 0.00339                        |
| Baseline | 0                     | 1.270                                      | 0.730    | -                         |            |                                        |                                |
| 7        | 0.3                   | 1.360                                      | 0.340    | 68.0                      | 18.82      | 423.3                                  | 0.0117                         |
| Baseline | 0                     | 1.360                                      | 0.640    | -                         |            |                                        |                                |
| 8        | 0.3                   | 1.500                                      | 0.200    | 75.0                      | 19.83      | 717.7                                  | 0.0275                         |
| Baseline | 0                     | 1.500                                      | 0.500    | -                         |            |                                        |                                |
| 9        | 0.3                   | 1.700                                      | 0        | 85.0                      | 21.26      | 325.3                                  | 0.00644                        |
| Baseline | 0                     | 1.700                                      | 0.300    | -                         |            |                                        |                                |
| 10       | 0.2                   | 1.800                                      | 0        | 90.0                      | 21.97      | 263.2                                  | 0.00311                        |
| Baseline | 0                     | 1.800                                      | 0.200    | -                         |            |                                        |                                |
| 11       | 0.1                   | 1.900                                      | 0        | 95.0                      | 22.69      | 227.8                                  | 0.00121                        |
| Baseline | 0                     | 1.900                                      | 0.100    | -                         |            |                                        |                                |

Table S10. **R3** pH 10.0

|          | Sample in THF<br>(mL) | H <sub>2</sub> O/ buffer<br>phosphate (mL) | THF (mL) | Final water<br>percentage | $\delta_H$ | $\varnothing$ (nm)<br>estimated values | $\Delta\text{ABS}_{(350-400)}$ |
|----------|-----------------------|--------------------------------------------|----------|---------------------------|------------|----------------------------------------|--------------------------------|
| 1        | 0.3                   | 0                                          | 1.700    | 0                         | 0.0        | 9.10                                   | 220.0                          |
| Baseline | 0                     | 0                                          | 2.000    | -                         |            |                                        |                                |
| 2        | 0.3                   | 0.900                                      | 0.800    | 45                        | 15.54      |                                        | -0.00072                       |
| Baseline | 0                     | 0.900                                      | 1.100    | -                         |            |                                        |                                |
| 3        | 0.3                   | 1.020                                      | 0.680    | 51.0                      | 16.393     | 336.6                                  | 0.00705                        |
| Baseline | 0                     | 1.020                                      | 0.980    | -                         |            |                                        |                                |
| 4        | 0.3                   | 1.190                                      | 0.510    | 59.5                      | 17.61      | 297.9                                  | 0.00497                        |
| Baseline | 0                     | 1.190                                      | 0.810    | -                         |            |                                        |                                |
| 5        | 0.3                   | 1.270                                      | 0.430    | 63.5                      | 18.18      | 275.0                                  | 0.00374                        |
| Baseline | 0                     | 1.270                                      | 0.730    | -                         |            |                                        |                                |
| 6        | 0.3                   | 1.360                                      | 0.340    | 68.0                      | 18.82      | 247.6                                  | 0.00227                        |
| Baseline | 0                     | 1.360                                      | 0.640    | -                         |            |                                        |                                |
| 7        | 0.3                   | 1.500                                      | 0.200    | 75.0                      | 19.83      | 262.1                                  | 0.00305                        |
| Baseline | 0                     | 1.500                                      | 0.500    | -                         |            |                                        |                                |
| 8        | 0.3                   | 1.600                                      | 0.100    | 80.0                      | 20.54      | 279.8                                  | 0.004                          |
| Baseline | 0                     | 1.600                                      | 0.400    | -                         |            |                                        |                                |
| 9        | 0.3                   | 1.700                                      | 0        | 85.0                      | 21.255     | 400.2                                  | 0.01046                        |
| Baseline | 0                     | 1.700                                      | 0.300    | -                         |            |                                        |                                |
| 10       | 0.2                   | 1.800                                      | 0        | 90.0                      | 21.97      | 253.5                                  | 0.00259                        |
| Baseline | 0                     | 1.800                                      | 0.200    | -                         |            |                                        |                                |
| 11       | 0.1                   | 1.840                                      | 0.060    | 92.0                      | 22.26      | 322.1                                  | 0.00627                        |
| Baseline | 0                     | 1.840                                      | 0.160    | -                         |            |                                        |                                |
| 12       | 0.1                   | 1.900                                      | 0        | 95.0                      | 22.69      | 320.0                                  | 0.00616                        |
| Baseline | 0                     | 1.900                                      | 0.100    | -                         |            |                                        |                                |
| 13       | 0                     | 2.000                                      | 0        | 100                       | 23.4       | 647.4                                  | 0.02373                        |
| Baseline | 0                     | 2.000                                      | 0        | -                         |            |                                        |                                |

Table S11. **R3** pH 11.8
